# Supplementary material for: Long Non-Coding RNAs in Liver Cancer and Nonalcoholic Steatohepatitis
Source: Noncoding RNA. 2020 Aug 29;6(3):34. doi: 10.3390/ncrna6030034 (PMC7549373; doi:10.3390/ncrna6030034)
Supplement: Supplementary file 1 [file ncrna-06-00034-s001.xlsx]

## Sheet: Table_S1
lncRNA	miRNA	Targets	PMID
AGAP2-AS1 (AGAP2 Antisense RNA 1)	miR-16-5p	ANXA11	31088485
AK054386	miR-199	None specified	31827704
ANRIL (CDKN2B antisense RNA 1)	miR-199a-5p	ARL2	31670868
ANRIL (CDKN2B antisense RNA 1)	miR-144	PBX3	31609763
ANRIL (CDKN2B antisense RNA 1)	miR-384	STAT3	31679275
BCYRN1 (brain cytoplasmic RNA 1)	miR-490-3p	POU3F2	31920461
BLACAT1 (bladder cancer associated transcript 1)	miR-485-5p	None specified	31174090
C1QTNF1-AS1 (C1QTNF1 antisense RNA 1)	miR-221-3p	SOCS3	31222560
C1QTNF1-AS1 (C1QTNF1 antisense RNA 1)	miR-221-3p	SOCS3	31069760
CASC2 (cancer susceptibility 2)	miR-222	None specified	31633393
CASC15 (cancer susceptibility 15)	miR-33a-5p	TWIST1	31401158
CCAT1 (colon cancer associated transcript 1)	miR-30c-2-3p	CCNE1	30773676
CRNDE (colorectal neoplasia differentially expressed)	miR-203	BCAT1	30230527
CRNDE (colorectal neoplasia differentially expressed)	miR-126-5p	BCL2L2	32031750
CRNDE (colorectal neoplasia differentially expressed)	miR-33a	HMGA2	31416393
DANCR (differentiation antagonizing non-protein coding RNA)	miR-27a-3p	LIMK1	31038266
DCST1-AS1 (DCST1 antisense RNA 1)	miR-1254	FAIM2	30617187
DLGAP1-AS1 (DLGAP1 antisense RNA 1)	miR-486-5p	H3F3B	31633236
EGOT (eosinophil granule ontogeny transcript)	miR-33a-5p	HMGA2	32021242
ENST00000608794 [SAP30-DT (SAP30 divergent transcript) isoform 201]	miR-15b-5p	PDK4	31330194
EPB41L4A-AS2 (EPB41L4A divergent transcript)	miR-301a-5p	FOXL1	30971290
F11-AS1 (F11 antisense RNA 1)	miR-3146	PTEN	31168823
FENDRR (FOXF1 adjacent non-coding developmental regulatory RNA)	miR-423-5p	GADD45B	31351327
FOXD2-AS1 (FOXD2 adjacent opposite strand RNA 1)	miR-150-5p	TMEM9	31210410
GAS5 (growth arrest specific 5)	miR-135b	MMP2	30733959
GAS5 (growth arrest specific 5)	miR-21	PTEN	31705194
GAS5 (growth arrest specific 5)	miR-23a	PTEN	30735452
GAS5 (growth arrest specific 5)	miR-544	RUNX3	30774011
Gm4419 (predicted gene 4419)	miR-455	SOX6	32114773
H19 (H19 imprinted maternally expressed transcript)	let-7	HMGA2	31063660
H19 (H19 imprinted maternally expressed transcript)	miR-148b-3p	NOX4	31082428
H19 (H19 imprinted maternally expressed transcript)	miR-675	PPARα	31574452
H19 (H19 imprinted maternally expressed transcript)	miR-130a	PPARγ	31064820
H19 (H19 imprinted maternally expressed transcript)	miR-148a	USP4	30362572
HAND2-AS1 (HAND2 antisense RNA 1)	miR-3118	SOCS5	32155348
HEIH (hepatocellular carcinoma up-regulated EZH2-associated long non-coding RNA)	miR-199a-3p	None specified	31144384
HOTAIR (HOX transcript antisense RNA)	miR-20b-5p	ATG7	30367982
HOTTIP (HOXA distal transcript antisense RNA)	miR-150	SRF	30548190
HOXA11-AS (HOXA11 antisense RNA)	miR-15a-3p	STAT3	31099097
HULC (hepatocellular carcinoma up-regulated long non-coding RNA)	miR-2052	c-Met	31645479
HULC (hepatocellular carcinoma up-regulated long non-coding RNA)	miR-372-3p	Rab11a	31558873
HULC (hepatocellular carcinoma up-regulated long non-coding RNA)	miR-675	Sirt1	31900225
KTN1-AS1 (KTN1 antisense RNA 1)	miR-23c	ERBB2IP	30551364
LEF1-AS1 (LEF1 antisense RNA 1)	miR-136-5p	WINK1	32068261
LINC00152 [CYTOR (cytoskeleton regulator RNA)]	miR-139	PIK3CA	31954697
LINC00205 (long intergenic non-protein coding RNA 205)	miR-122-5p	None specified	31272761
LINC00346 [PRECSIT (p53 regulated carcinoma associated Stat3 activating long intergenic non-protein coding transcript)]	miR-199a-3p	CDK1, CCNB1	32133348
LINC00460 (long intergenic non-protein coding RNA 460)	miR-485-5p	PAK1	31376654
LINC00461 (long intergenic non-protein coding RNA 461)	miR-149-5p	LRIG2	30879766
LINC00472 (long intergenic non-protein coding RNA 472)	miR-93-5p	PDCD4	30522853
LINC00483 [ANKRD40CL (ANKRD40 C-terminal like)]	miR-204-3p	FMNL2	30594388
LINC00488 (long intergenic non-protein coding RNA 488)	miR-330-5p	TLN1	31005556
LINC00665 (long intergenic non-protein coding RNA 665)	miR-186-5p	MAP4K3	31433582
LINC00958 (long intergenic non-protein coding RNA 958)	miR-3619-5p	HDGF	31915027
LINC01224 (long intergenic non-protein coding RNA 1224)	miR-330-5p	CHEK1	31902747
LINC01234 (long intergenic non-protein coding RNA 1234)	miR-31-5p	MAGEA3	31838274
LMCD1-AS1 (LMCD1 antisense RNA 1)	let-7g	P4HA2	31278071
lnc-UCID (lncRNA up-regulating CDK6 by interacting with DHX9)	miR-148a	CDK6	30865310
MALAT1 (metastasis associated lung adenocarcinoma transcript 1)	miR-26b	COL1A2	31513886
MALAT1 (metastasis associated lung adenocarcinoma transcript 1)	miR-200a	None specified	31347327
MCM3AP-AS1 (MCM3AP antisense RNA 1)	miR-194-5p	FOXA1	30782188
MCM3AP-AS1 (MCM3AP antisense RNA 1)	miR-455	None specified	31237446
MEG3 (maternally expressed 3)	miR-214	ATF4	30431065
MEG3 (maternally expressed 3)	miR-21	LRP6	30711569
MEG3 (maternally expressed 3)	miR-26b-5p	PDGFR-β	30901579
MEG3 (maternally expressed 3)	miR-9-5p	SOX11	31531526
MFI2-AS1 [MELTF-AS1 (MELTF antisense RNA 1)]	miR-134	FOXM1	32106369
MIAT (myocardial infarction associated transcript)	miR-520d-3p	EPHA2	30551417
MIR22HG (MIR22 host gene)	miR-10a-5p	NCOR2	30680848
Mirt2 (myocardial infraction associated transcript 2)	miR-34a-5p	USP10	30898698
NEAT1 (nuclear paraspeckle assembly transcript 1)	miR-22-3p	AKT2	31802908
NEAT1 (nuclear paraspeckle assembly transcript 1)	miR-29b	Atg9	31610195
NEAT1 (nuclear paraspeckle assembly transcript 1)	miR-335	c-Met	30937906
NEAT1 (nuclear paraspeckle assembly transcript 1)	miR-506	GLI3	31957704
NEAT1 (nuclear paraspeckle assembly transcript 1)	miR-140	None specified	31239155
NEAT1 (nuclear paraspeckle assembly transcript 1)	miR-146a-5p	ROCK1	31484042
NEAT1 (nuclear paraspeckle assembly transcript 1)	miR-155	Tim-3	30710754
NEAT1 (nuclear paraspeckle assembly transcript 1)	let-7a	TLR4	31344555
NORAD (non-coding RNA activated by DNA damage)	miR-202-5p	None specified	30537113
NRAL (Nrf2 regulation-associated lncRNA)	miR-340-5p	Nrf2	30030687
OIP5-AS1 (OIP5 antisense RNA 1)	miR-363-3p	SOX4	32042127
PCNAP1 (proliferating cell nuclear antigen pseudogene 1)	miR-154	PCNA	31410212
PDIA3P1 (protein disulfide isomerase family A member 3 pseudogene 1)	miR-125a/b and miR-124	TRAF6	31509261
PIK3CD-AS1 (PIK3CD antisense RNA 1)	miR-566	LATS1	31624469
PTTG3P (pituitary tumor-transforming 3, pseudogene)	miR-383	CCND1, PARP2	31340767
PVT1 (Pvt1 oncogene)	miR-365	ATG3	30794914
RP11-422N16.3	miR-23b-3p	DMGDH	31849497
SNHG1 (small nucleolar RNA host gene 1)	miR-195-5p	PDCD4	31330233
SNHG3 (small nucleolar RNA host gene 3)	miR-326	SMAD3, ZEB1	31548493
SNHG7 (small nucleolar RNA host gene 7)	miR-378a-3p	DVL2	31272073
SNHG7 (small nucleolar RNA host gene 7)	miR-425	None specified	31478234
SNHG7 (small nucleolar RNA host gene 7)	miR-122-5p	RPL4	31545291
SNHG10 (small nucleolar RNA host gene 10)	miR-150-5p	RPL4	31101763
SNHG15 (small nucleolar RNA host gene 15)	miR-490-3p	HDAC2	31636472
SNHG16 (small nucleolar RNA host gene 16)	miR-302a-3p	FGF19	30784284
SNHG16 (small nucleolar RNA host gene 16)	miR-140-5p	None specified	30655679
SNHG16 (small nucleolar RNA host gene 16)	miR‐17‐5p	p62	31256427
SNHG16 (small nucleolar RNA host gene 16)	miR-4500	STAT3	30779219
TATDN1 (TatD DNase domain containing 1)	miR-6089	LIX1L	31378885
TINCR (TINCR ubiquitin domain containing)	miR-214-5p	ROCK1	31900116
XIST (X inactive specific transcript)	miR-29b	HMGB1	31418997
ZEB1-AS1 (ZEB1 antisense RNA 1)	miR-365a-3p	E2F2	30988735
Supplementary Table S1. List of recently identified lncRNAs functioning as miRNA sponges in the liver.
